# Supplementary material for: Ultra-low HIV-1 p24 detection limits with a bioelectronic sensor
Source: PubMed Central journal article supplement (PMC7005089; doi:10.1007/s00216-019-02319-7), 2019-12-21
Supplement: 216_2019_2319_MOESM1_ESM.pdf [file 216_2019_2319_MOESM1_ESM.pdf]

**Analytical and Bioanalytical Chemistry**

**Electronic Supplementary Material**

**Ultra-low HIV-1 p24 detection limits with a bioelectronic sensor**

Eleonora Macchia, Lucia Sarcina, Rosaria Anna Picca, Kyriaki Manoli, Cinzia Di Franco,  
Gaetano Scamarcio, Luisa Torsi

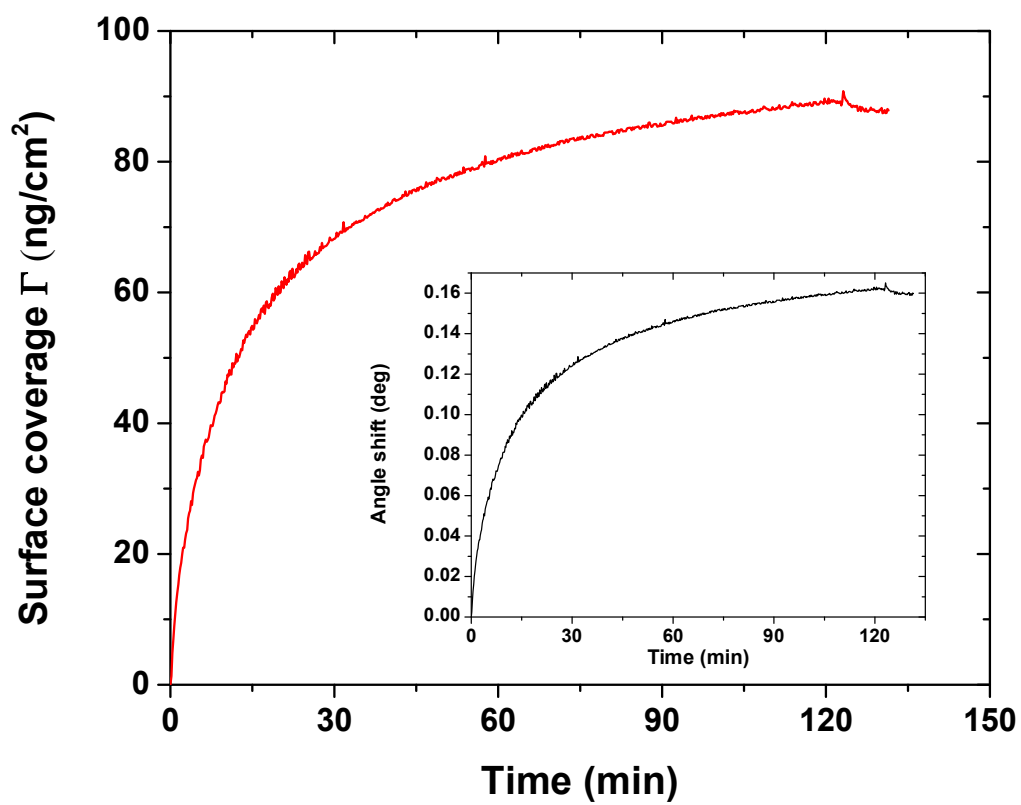

**Fig. S1** Anti-HIV p-24 surface loading vs. time. Inset: corresponding angular response of the bioreceptor binding to the surface as a function of time
